# Supplementary material for: Distribution of Vitamin B12 Absorption in a Community and Factors Associated with the Response to Long-term Oral Supplementation
Source: Research Square preprint supplement (doi:10.21203/rs.3.rs-7551002/v1), 2025-09-23
Supplement: Supplementary file 1 [file 16757c015048bc54266bf7b9.xlsx]

## Sheet: Sheet1
Table 2: Supplementation Study: Proportion of participants in epidemiological B-12 category of cB12 at baseline, 4, and 12 months.
	Baseline	4 months	12 months
Placebo group
B-12 Adequacy	0.46	0.42	0.5
Transitional B-12 status	0.52	0.52	0.48
Low B-12 status	0.02	0.06	0.02
B-12, 2µg-group
B-12 Adequacy	0.415	0.66	0.733
Transitional B-12 status	0.543	0.34	0.267
Low B-12 status	0.042	0	0
B-12, 10µg-group
B-12 Adequacy	0.357	0.827	0.857
Transitional B-12 status	0.602	0.173	0.143
Low B-12 status	0.041	0	0
Numbers are proportions. cB12 was calculated as per S Fedosov [23]. [B-12 Adequacy: cB12 >-0.5; Transitional B-12 status: cB12 > -2.5- < -0.5; Low B-12 status: cB12 <-2.5].
