# Supplementary material for: Distribution of Vitamin B12 Absorption in a Community and Factors Associated with the Response to Long-term Oral Supplementation
Source: Research Square preprint supplement (doi:10.21203/rs.3.rs-7551002/v1), 2025-09-23
Supplement: Supplementary file 2 [file ec82f86f9862b246d1c1d9be.xlsx]

## Sheet: Sheet1
Table 3: Supplementation Study: Predictors of the response to B-12 supplementation. Outcomes: plasma B-12 at 4 months, 12 months, and 4 + 12 months (longitudinal).
	Plasma B-12		Plasma B-12		Plasma B-12
	at 4 months		at 12 months		at 4 and 12 months
	Beta (S.E.)	P	Beta (S.E.)	P	Beta (S.E.)	P
Weight (kg)	-0.009 (0.002)	0.028	-0.007 (0.002)	0.003	-0.007 (0.002)	0.003
Sex: Female	0.105 (0.064)	0.139	0.048 (0.053)	0.367	0.062 (0.046)	0.183
Rise in holoTC (pmol/L)	0.005 (0.001)	<0.0001	0.002 (0.001)	0.012	0.003 (0.001)	<0.0001
B-12 supplement (2 µg)	0.427 (0.076)	<0.0001	0.166 (0.057)	0.004	0.524 (0.090)	<0.0001
B-12 supplement (10 µg)	0.600 (0.077)	<0.0001	0.411 (0.056)	<0.0001	0.742 (0.088)	<0.0001
Folic acid dose (200 µg)	-0.023 (0.062)	0.714	-0.003 (0.046)	0.95	-0.015 (0.050)	0.76
Length of supplementation	-0.007 (0.003)	0.057	0.004 (0.002)	0.022	0.001 (0.000)	<0.0001
Compliance (%)	0.002 (0.002)	0.392	0.002 (0.001)	0.09	0.003 (0.001)	0.017
R2	0.665		0.658		0.634
Predictors included are weight, sex, rise in plasma holoTC adjusted for the dose of B-12 (2 and 10 µg) in the absorption study, supplementation dose (B-12, Folic acid), and compliance. Models are adjusted for stratification (above/below the child’s median B-12, 188 pmol/L.
