# Supplementary material for: Distribution of Vitamin B12 Absorption in a Community and Factors Associated with the Response to Long-term Oral Supplementation
Source: Research Square preprint supplement (doi:10.21203/rs.3.rs-7551002/v1), 2025-09-23
Supplement: Supplementary file 3 [file f837c43a59b4a8477df2a588.xlsx]

## Sheet: Sheet1
Table 1. Absorption Study: Response of plasma holo-TC to the B-12 Absorption protocol in 2 and 10 µg B-12 groups.
	10 µg group			2 µg group
	Children	Father	Mother	Children	Father	Mother
N	64	60	65	43	35	43
Baseline plasma holo-TC, pmol/L	9	7	7	7.5	7	7
	(7.0, 10.8)	(5.0, 7.0)	(7.0, 10.0)	(7.0, 15.8)	(7.0, 9.0)	(7.0, 9.0)
24-hr plasma holo-TC, pmol/L	64.5	45	47	49.5	19	28
	(45.3, 88.0)	(30.3, 57.0)	(36.5, 60.5)	(37.3, 58.8)	(13.0, 32.0)	(18.0, 36.0)
Rise of plasma holo-TC from baseline, pmol/L	55	39	39	39	10	19
	(36.3, 76.3)	(23.3, 48.8)	(25.5, 50.5)	(27.0, 46.8)	(6.0, 22.0)	(11.0, 26.0)
				Numbers are median (25th, 75th percentile).
